# Supplementary material
Source: publisher figshare collection journal article supplement (https://asha.figshare.com/ndownloader/files/22291113)
Supplement: Supplementary file 1 [file 22291113]

## Supplemental Material S1. Survey.

This survey seeks to gain information about your doctoral preparation in research, teaching, and professional development, as well as your experiences in those areas in relation to your career following graduation. Our goal is to provide information to doctoral programs that can help address the current and expected shortage of doctoral-level professionals in academic and research careers by improving strategies to recruit, prepare, and graduate doctoral students and inspire them to take academic and research positions. Your completion of this survey will help us in that effort.

### Research Preparation In Your Doctoral Program

1. For the activities below, please indicate how helpful each was in your preparation to conduct research. Check N/A if the activity was not experienced. Then indicate whether you think the activity would be helpful to include in a doctoral program, whether you experienced it or not.

| Activity                                               | How helpful was this activity in your research preparation? |                    |             |    | Should this activity be included in a doctoral program? |    |
|--------------------------------------------------------|-------------------------------------------------------------|--------------------|-------------|----|---------------------------------------------------------|----|
|                                                        | Very helpful                                                | Moderately helpful | Not helpful | NA | Yes                                                     | No |
| Taking a doctoral level course in research design      |                                                             |                    |             |    |                                                         |    |
| Taking a course in grant writing                       |                                                             |                    |             |    |                                                         |    |
| Receiving hands on research mentoring                  |                                                             |                    |             |    |                                                         |    |
| Working on research project/s of primary mentor        |                                                             |                    |             |    |                                                         |    |
| Working on research project/s of other faculty/mentors |                                                             |                    |             |    |                                                         |    |
| Being exposed to all phases of grant writing           |                                                             |                    |             |    |                                                         |    |
| Developing an IRB proposal                             |                                                             |                    |             |    |                                                         |    |
| Designing a research study                             |                                                             |                    |             |    |                                                         |    |
| Discussing ethical issues that might arise in research |                                                             |                    |             |    |                                                         |    |
| Implementing a research study                          |                                                             |                    |             |    |                                                         |    |
| Collecting original data                               |                                                             |                    |             |    |                                                         |    |
| Co-authoring a manuscript submitted for publication    |                                                             |                    |             |    |                                                         |    |

|                                                                                     |  |  |  |  |  |  |
|-------------------------------------------------------------------------------------|--|--|--|--|--|--|
| Serving as first author of manuscript submitted for publication                     |  |  |  |  |  |  |
| Receiving feedback on writing                                                       |  |  |  |  |  |  |
| Submitting grant proposal with faculty member or another student                    |  |  |  |  |  |  |
| Submitting grant proposal as Principal Investigator                                 |  |  |  |  |  |  |
| Co-presenting research findings at a national conference                            |  |  |  |  |  |  |
| Presenting research findings at a national conference as the lead or sole presenter |  |  |  |  |  |  |

2. By the time you entered your doctoral program, had you identified a clear research interest?  
Yes \_\_\_\_ No \_\_\_\_
3. By the time you entered your doctoral program, did you have an identified mentor?  
Yes \_\_\_\_ No \_\_\_\_
4. How many research mentors did you have during your program?  
\_\_\_\_ 0 \_\_\_\_ 1 \_\_\_\_ 2 \_\_\_\_ 3 \_\_\_\_ more than 3
5. How many different research projects did you have an opportunity to work on during your doctoral program (including your dissertation)?  
\_\_\_\_ 1 \_\_\_\_ 2 \_\_\_\_ 3 \_\_\_\_ more than 3
6. How many research projects were **required** as part of your program (including your dissertation)?  
\_\_\_\_ 1 \_\_\_\_ 2 \_\_\_\_ 3 \_\_\_\_ more than 3
7. Overall, how well did your doctoral program prepare you to conduct research?  
Very well \_\_\_\_ Moderately well \_\_\_\_ Poorly \_\_\_\_ Not at all \_\_\_\_

8. What other research activities would you have liked to have experienced (or experienced more often) in your doctoral program?
- 

### Teaching Preparation in Your Doctoral Program

1. For the activities below, please indicate how helpful each was in your preparation to teach. Check "Not applicable (N/A)" if the activity was not experienced. Then indicate whether you think the activity would be helpful to include in a doctoral program, whether you experienced it or not.

| Activity                                                             | How helpful was this activity in your teaching preparation? |                    |             |     | Should this activity be included in a doctoral program? |    |
|----------------------------------------------------------------------|-------------------------------------------------------------|--------------------|-------------|-----|---------------------------------------------------------|----|
|                                                                      | Very Helpful                                                | Moderately Helpful | Not Helpful | N/A | Yes                                                     | No |
| Serving as a teaching assistant                                      |                                                             |                    |             |     |                                                         |    |
| Co-teaching a course with faculty member or another doctoral student |                                                             |                    |             |     |                                                         |    |
| Independently teaching at least one course                           |                                                             |                    |             |     |                                                         |    |
| Developing a syllabus for a course                                   |                                                             |                    |             |     |                                                         |    |
| Developing a written teaching philosophy                             |                                                             |                    |             |     |                                                         |    |
| Taking a full course on teaching                                     |                                                             |                    |             |     |                                                         |    |
| Faculty observing your teaching with feedback                        |                                                             |                    |             |     |                                                         |    |
| Other doctoral students observing your teaching with feedback        |                                                             |                    |             |     |                                                         |    |
| Having your teaching videotaped with feedback                        |                                                             |                    |             |     |                                                         |    |
| Using resources from your campus' center for teaching and learning   |                                                             |                    |             |     |                                                         |    |

2. Did you receive mentoring in your teaching experiences?

Yes \_\_\_\_ No \_\_\_\_

3. How would you rate the mentoring in teaching you received during your doctoral program?:

Excellent \_\_\_\_ Good \_\_\_\_ Fair \_\_\_\_ Poor \_\_\_\_

4. Overall, how well did your doctoral program prepare you for teaching?  
Very well \_\_\_\_ Moderately well \_\_\_\_ Poorly \_\_\_\_ Not at all \_\_\_\_
  5. What other components of teaching preparation would you have liked to experience (or experienced more often) in your doctoral program?
- 

### Other Job Readiness Preparation During Your Doctoral Program

We define *other job readiness preparation* as those additional activities focused on readying you for your future position (e.g., preparing your vita, rehearsing job talks, discussion of startup lab needs).

1. For the activities below, please indicate how helpful each was in your job readiness preparation. Check N/A if the activity was not experienced. Then indicate whether you think the activity would be helpful to include in a doctoral program whether you experienced it or not.

| Activity                                                                                               | How helpful was this activity in your job readiness preparation? |                    |             |    | Should this activity be included in a doctoral program? |    |
|--------------------------------------------------------------------------------------------------------|------------------------------------------------------------------|--------------------|-------------|----|---------------------------------------------------------|----|
|                                                                                                        | Very helpful                                                     | Moderately helpful | Not helpful | NA | Yes                                                     | No |
| Completing a review of a journal manuscript for publication                                            |                                                                  |                    |             |    |                                                         |    |
| Receiving feedback on your curriculum vita                                                             |                                                                  |                    |             |    |                                                         |    |
| Discussions of the pros/cons of varied career paths (e.g., academic, research, clinical, policy)       |                                                                  |                    |             |    |                                                         |    |
| Discussions of the pros and cons of doing a post-doctoral fellowship                                   |                                                                  |                    |             |    |                                                         |    |
| Discussions about job interviewing                                                                     |                                                                  |                    |             |    |                                                         |    |
| Discussions about setting up a research lab                                                            |                                                                  |                    |             |    |                                                         |    |
| Opportunities to practice job talk/s                                                                   |                                                                  |                    |             |    |                                                         |    |
| Discussions on negotiating strategies for obtaining first job                                          |                                                                  |                    |             |    |                                                         |    |
| Discussions about prioritizing your responsibilities during your first job                             |                                                                  |                    |             |    |                                                         |    |
| Discussions about furthering your research career (e.g., grant writing, publications, journal reviews) |                                                                  |                    |             |    |                                                         |    |

2. Overall, how well did your doctoral program prepare you for an academic career?  
Very well \_\_\_\_ Moderately well \_\_\_\_ Poorly \_\_\_\_ Not at all \_\_\_\_

3. Other activities of job readiness preparation that were helpful OR you would like to have experienced (or experienced more often) in your program:

---

### Overall Preparation for and Challenges in Doctoral Study

1. How influential was each of the following factors in your decision to complete a PhD in CSD?  
(very influential, moderately influential, not at all influential, N/A if activity was not experienced)

| Factor                                                               | How influential was this factor in your decision to pursue a Ph.D.? |                        |                 |    |
|----------------------------------------------------------------------|---------------------------------------------------------------------|------------------------|-----------------|----|
|                                                                      | Very influential                                                    | Moderately influential | Not influential | NA |
| Completion of a thesis                                               |                                                                     |                        |                 |    |
| Non-thesis research experiences as undergraduate or master's student |                                                                     |                        |                 |    |
| Research mentorship in undergraduate or master's program             |                                                                     |                        |                 |    |
| Specialized research track for students in master's degree program   |                                                                     |                        |                 |    |
| Encouragement by faculty to consider an advanced degree              |                                                                     |                        |                 |    |
| Influence of family or friends                                       |                                                                     |                        |                 |    |
| Knowledge of doctoral shortage in CSD                                |                                                                     |                        |                 |    |
| Potential to work with a specific research mentor                    |                                                                     |                        |                 |    |
| Availability of funding                                              |                                                                     |                        |                 |    |
| Desired research career in CSD                                       |                                                                     |                        |                 |    |
| Desired teaching career in CSD                                       |                                                                     |                        |                 |    |
| Desired clinical degree in CSD                                       |                                                                     |                        |                 |    |
| Desired administrative career in CSD                                 |                                                                     |                        |                 |    |

2. What other factors influenced your decision to complete a PhD in CSD?

---

3. On entry into your doctoral program, how well did your perceptions of what doctoral studies would entail match what actually took place in your program?

Matched very well \_\_\_\_\_ Matched moderately well \_\_\_\_\_ Matched poorly \_\_\_\_\_

Did not match at all \_\_\_\_\_

(Skip logic within Qualtrics will skip to #6 if "well matched" selected)

4. Which of the following factors played a role in the mismatch between your perceptions and what took place in your program? (check all that apply)

☐ Rigor of program was greater than expected  
☐ Rigor of program was less than expected  
☐ Not prepared for the teaching demands  
☐ Did not anticipate the large time commitment  
☐ Not provided sufficient opportunities for mentored research  
☐ Not provided sufficient opportunities for mentored teaching  
☐ Was not aware of the expectations for research productivity  
☐ Was not familiar with the sequence of steps in completing a PhD  
☐ Did not understand the importance of a good mentor-mentee match

5. What other perceptions did you have upon entry that were not "well matched" with what happened in your program?
- 

6. Did you complete graduate clinical training in SLP or Audiology before or during your PhD program?

Yes ☐ No ☐

7. If a clinical doctorate in SLP had been available when you were considering the PhD program, would you have preferred to pursue that degree instead?

Yes ☐ No ☐

8. How important was each of the following in helping you complete your doctoral program? (very important, moderately important, not at all important, N/A if not experienced)

| Factor                                                                        | How important was this factor in helping you complete your Ph.D. program? |                    |             |    |
|-------------------------------------------------------------------------------|---------------------------------------------------------------------------|--------------------|-------------|----|
|                                                                               | Very helpful                                                              | Moderately helpful | Not helpful | NA |
| Supportive peers                                                              |                                                                           |                    |             |    |
| Supportive mentor/s                                                           |                                                                           |                    |             |    |
| Supportive family members                                                     |                                                                           |                    |             |    |
| Sense of community                                                            |                                                                           |                    |             |    |
| Financial support                                                             |                                                                           |                    |             |    |
| Departmental or university activities (symposia, writing groups)              |                                                                           |                    |             |    |
| Professional development resources (resume writing, interviewing preparation) |                                                                           |                    |             |    |
| Dissertation writing group                                                    |                                                                           |                    |             |    |

9. What other factors were important in helping you complete your doctoral program?

---

10. How much of a challenge was each of the following in completing your doctoral program?

| Activity                                                     | How challenging was this factor in completing your Ph.D. program? |                        |                 |    |
|--------------------------------------------------------------|-------------------------------------------------------------------|------------------------|-----------------|----|
|                                                              | Very challenging                                                  | Moderately challenging | Not challenging | NA |
| Lack of "hands on" mentoring                                 |                                                                   |                        |                 |    |
| Unclear guidelines of what was expected                      |                                                                   |                        |                 |    |
| Your own limited writing skills                              |                                                                   |                        |                 |    |
| Your own limited skills in statistics and/or research design |                                                                   |                        |                 |    |
| Lack of support from peer group                              |                                                                   |                        |                 |    |
| Frustration with lack of progress                            |                                                                   |                        |                 |    |
| Lack of support from faculty                                 |                                                                   |                        |                 |    |
| Lack of financial support                                    |                                                                   |                        |                 |    |

What other challenges did you face in completing your doctoral program?

---

### Current Career Position:

1. What type of career position do you currently hold (check all that apply)?

- ☐ Academic Research
- ☐ Academic Teaching
- ☐ Academic Clinical Supervision
- ☐ Academic Administrative
- ☐ Non-Academic Research
- ☐ Non-Academic Clinical Supervision
- ☐ Non-Academic Clinical Practice
- ☐ Non-Academic Administrative
- ☐ Postdoctoral Fellowship
- ☐ Industry
- ☐ Policy
- ☐ Project Coordinator for Research Study

Other type of current career position: \_\_\_\_\_

2. Is your current position in the field of communication sciences and disorders?

Yes \_\_\_\_ No \_\_\_\_

If no, in what field is your current position? \_\_\_\_\_

3. What were the primary reasons you chose your current job (check all that apply)?

- \_\_\_\_ Job security
- \_\_\_\_ Salary and/or benefits
- \_\_\_\_ Prestige of the program
- \_\_\_\_ Flexibility
- \_\_\_\_ Family-friendliness
- \_\_\_\_ Collegiality of co-workers
- \_\_\_\_ Specific colleague in my focus area
- \_\_\_\_ Availability of particular study population
- \_\_\_\_ Less pressure than other job types
- \_\_\_\_ Location
- \_\_\_\_ Spouse's position
- \_\_\_\_ Focus on research
- \_\_\_\_ Focus on teaching
- \_\_\_\_ Focus on clinical services or supervision
- \_\_\_\_ Focus on administration/policy

Other reasons you chose your current job: \_\_\_\_\_

4. What aspects of your current position do you find most appealing?

\_\_\_\_\_

5. If you currently work for a university or college, how would you characterize your department/program in terms of the proportional focus on teaching and research responsibilities?  
(Please **choose only one**) (skip logic to only provide to those who chose academic in Q1)

- \_\_\_\_ Primary focus is on research, teaching is also important
- \_\_\_\_ Equal focus on research and teaching
- \_\_\_\_ Primary focus on teaching, research is important
- \_\_\_\_ Primary focus on teaching, research focus is limited

6. Regardless of your **current position**, how prepared do you feel to accomplish the following roles and responsibilities?



| Role or Responsibility              | How well prepared for this role do you feel? |                     |              |    |
|-------------------------------------|----------------------------------------------|---------------------|--------------|----|
|                                     | Well prepared                                | Moderately prepared | Not prepared | NA |
| Mentoring students                  |                                              |                     |              |    |
| Writing manuscripts                 |                                              |                     |              |    |
| Teaching                            |                                              |                     |              |    |
| Setting up a lab                    |                                              |                     |              |    |
| Conducting research                 |                                              |                     |              |    |
| Clinical supervision                |                                              |                     |              |    |
| Committee work                      |                                              |                     |              |    |
| Grant writing                       |                                              |                     |              |    |
| Balancing multiple responsibilities |                                              |                     |              |    |

7. Are there any other areas of your doctoral program that you would like to provide information about to help guide the future of doctoral education?
- 

#### Demographic Information:

- What is your gender?: \_\_\_\_\_ Female \_\_\_\_\_ Male
- Are you of Hispanic or Latino origin? \_\_\_\_\_ Yes \_\_\_\_\_ No
- What is your race? (check all that apply)
  - \_\_\_\_\_ White
  - \_\_\_\_\_ African-American/Black
  - \_\_\_\_\_ Asian
  - \_\_\_\_\_ American Indian/Alaska Native
  - \_\_\_\_\_ Pacific Islander/Hawaiian Native
  - \_\_\_\_\_ Other, please specify: \_\_\_\_\_
- From which doctoral program did you graduate? (list provided) **This information will ONLY be used to identify your programs' region and level of research intensity and will not be connected to you or your responses in any way. Only aggregate data will be used in any reports or published articles and no participant's responses will be connected to a particular university.**

Other doctoral program: \_\_\_\_\_
- In what year was your PhD granted? \_\_\_\_\_

6. How many years did it take to complete your doctoral program?  
\_\_\_\_ Less than 4 years  
\_\_\_\_ 4 years  
\_\_\_\_ 5 years  
\_\_\_\_ 6 years  
\_\_\_\_ more than 6 years
7. What was the specialization of your PhD?  
\_\_\_\_ Audiology  
\_\_\_\_ Hearing Science  
\_\_\_\_ Language Science  
\_\_\_\_ Speech-Language Pathology  
\_\_\_\_ Speech Science  
\_\_\_\_ Other (please specify) \_\_\_\_\_
8. Were you encouraged by faculty to complete a postdoctoral fellowship? \_\_\_\_ Yes \_\_\_\_ No
9. Did you complete a postdoctoral fellowship? \_\_\_\_ Yes \_\_\_\_ No
10. Since **beginning** your PhD program, how many research presentations have you made at conferences? National \_\_\_\_ State \_\_\_\_
11. Since **beginning** your PhD program, how many research papers have you submitted for publication that you authored or coauthored? \_\_\_\_  
  
How many were accepted (including those accepted for publication but not yet published)? \_\_\_\_
12. Since **beginning** your PhD program, how many external grants (outside of the university) have you submitted as Principal Investigator or Co-PI? \_\_\_\_ How many were funded? \_\_\_\_
13. Since **beginning** your PhD program, how many internal grants (inside the university) have you submitted as Principal Investigator or Co-PI? \_\_\_\_ How many were funded? \_\_\_\_

Thank you for your participation in this survey. The results will help guide the preparation of future doctoral students in Communication Sciences and Disorders.
